# Supplementary material for: Glacial limitation of tropical mountain height
Source: Copernicus journal article supplement (doi:10.5194/esurf-7-147-2019), 2019-01-31
Supplement: Supplementary file 1 [file esurf-7-147-2019-supplement.pdf]

Supplement of Earth Surf. Dynam., 7, 147–169, 2019  
<https://doi.org/10.5194/esurf-7-147-2019-supplement>  
© Author(s) 2019. This work is distributed under  
the Creative Commons Attribution 4.0 License.

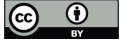

*Supplement of*

## **Glacial limitation of tropical mountain height**

**Maxwell T. Cunningham et al.**

*Correspondence to:* Maxwell T. Cunningham ([maxwellc@ldeo.columbia.edu](mailto:maxwellc@ldeo.columbia.edu))

The copyright of individual parts of the supplement might differ from the CC BY 4.0 License.

## Supplementary Information

### Glacial limitation of tropical mountain height

This document provides raw analytical data used in exposure age calculation and presents alternative age estimates for different scaling schemes and production rates.

#### S1. $^{10}\text{Be}$ Raw data

#### $^{10}\text{Be}$ exposure age dating analysis

DR Table 1. Geographical and analytical data for the samples from Chirripó

| Sample ID      | CAMS laboratory no. | Lat.    | Long.     | Elev. (m) | Thickness (cm) | Topographic Shielding | Mass (g) | Be Carrier (g) | $^{10}\text{Be}/^9\text{Be}$ ( $10^{14}$ ) | $^{10}\text{Be}$ Conc. ( $10^4$ atm/g) | $^{10}\text{Be}/^9\text{Be}$ ratio standard |
|----------------|---------------------|---------|-----------|-----------|----------------|-----------------------|----------|----------------|--------------------------------------------|----------------------------------------|---------------------------------------------|
| VMR-14-01      | BE38094             | 9.50002 | -83.48929 | 3481      | 2.47           | 0.986                 | 5.0076   | 0.1874944      | $14.7873 \pm 0.2374$                       | $37.1591 \pm 0.5868$                   | 07KNSTD                                     |
| VMR-14-02      | BE38095             | 9.49426 | -83.48659 | 3497      | 0.75           | 0.987                 | 5.0061   | 0.1882112      | $15.2234 \pm 0.2818$                       | $38.3532 \pm 0.6985$                   | 07KNSTD                                     |
| VMR-14-03      | BE38096             | 9.4998  | -83.48961 | 3470      | 0.85           | 0.985                 | 5.0503   | 0.1873920      | $15.7785 \pm 0.2923$                       | $39.2368 \pm 0.7152$                   | 07KNSTD                                     |
| VMR-14-04      | BE38097             | 9.50518 | -83.49237 | 3417      | 0.69           | 0.967                 | 5.0570   | 0.1880064      | $14.9551 \pm 0.3521$                       | $37.4769 \pm 0.8500$                   | 07KNSTD                                     |
| VMR-14-05      | BE38098             | 9.5062  | -83.49303 | 3393      | 0.42           | 0.968                 | 5.0440   | 0.1873920      | $15.4086 \pm 0.2471$                       | $38.4477 \pm 0.6065$                   | 07KNSTD                                     |
| VTL-14-02      | BE38103             | 9.45346 | -83.50319 | 3425      | 1.25           | 0.989                 | 5.0159   | 0.1856512      | $1.49129 \pm 0.2397$                       | $37.1071 \pm 0.5862$                   | 07KNSTD                                     |
| MCH-14-03      | BE38100             | 9.48582 | -83.49130 | 3759      | 1.01           | 0.987                 | 5.0321   | 0.1871872      | $22.4575 \pm 0.4156$                       | $55.9493 \pm 1.0186$                   | 07KNSTD                                     |
| MCH-14-02      | BE38102             | 9.48461 | -83.48900 | 3814      | 0.88           | 0.997                 | 1.5524   | 0.1871872      | $2.88263 \pm 0.0951$                       | $23.3869 \pm 0.7673$                   | 07KNSTD                                     |
| MCH-14-01      | BE38099             | 9.4832  | -83.48698 | 3674      | 6.08           | 0.872                 | 3.4982   | 0.1873920      | $8.81571 \pm 0.1635$                       | $31.6230 \pm 0.5771$                   | 07KNSTD                                     |
| BLK1-2014Oct23 |                     |         |           |           |                |                       |          | 0.1869824      | $0.01653 \pm 0.0080$                       |                                        |                                             |

**Table S1.** A procedural blank was processed identically with these samples, and is listed at the end of the table. Results are given with  $1\sigma$  analytical AMS uncertainties. We used a Garmin eTrex handheld GPS to record altitude and position (WGS84). Samples were measured with a Be carrier concentration of 1024 ppm. AMS ratio and Be concentration data presented in this table as originally measured against the specified standard in the last column. Reported values are corrected for background  $^{10}\text{Be}$  detected in associated procedural blank listed below samples. Reported  $^{10}\text{Be}/^9\text{Be}$  value for 07KNSTD standard material is  $^{10}\text{Be}/^9\text{Be}=2.85 \times 10^{-12}$ , respectively (Nishiizumi et al., 2007;  $^{10}\text{Be}$  half life = 1.36 Myr).

DR Table 2. Surface exposure ages at Chirripó

| Sample ID | Kelly et al., 2013 |                 | Blard et al., 2013 |                  |
|-----------|--------------------|-----------------|--------------------|------------------|
|           | St age             | Lm age          | St age             | Lm age           |
| VMR-14-01 | $16900 \pm 500$    | $16300 \pm 500$ | $16000 \pm 900$    | $15800 \pm 1000$ |
| VMR-14-02 | $17100 \pm 500$    | $16500 \pm 500$ | $16200 \pm 300$    | $15900 \pm 1000$ |
| VMR-14-03 | $17700 \pm 500$    | $17100 \pm 500$ | $16800 \pm 900$    | $16500 \pm 1000$ |
| VMR-14-04 | $17600 \pm 600$    | $17000 \pm 600$ | $16700 \pm 1000$   | $16400 \pm 1100$ |
| VMR-14-05 | $18300 \pm 500$    | $17600 \pm 500$ | $17400 \pm 1000$   | $17000 \pm 1100$ |
| MCH-14-01 | $15200 \pm 500$    | $14800 \pm 400$ | $14400 \pm 800$    | $14300 \pm 900$  |
| MCH-14-03 | $22000 \pm 700$    | $20800 \pm 600$ | $20900 \pm 1200$   | $20000 \pm 1300$ |
| MCH-14-02 | $8750 \pm 400$     | $8400 \pm 300$  | $8300 \pm 500$     | $8000 \pm 600$   |
| VTL-14-02 | $17100 \pm 500$    | $16500 \pm 500$ | $16200 \pm 900$    | $16000 \pm 1000$ |

**Table S2.** Production rates determined by Kelly et al. (2013) and Blard et al. (2013). Age uncertainties include internal analytical error. The discussion in the main text is based on St ages and the Kelly et al. (2013) production rate, although our conclusions are unaffected by choice of scaling model.
